# Supplementary material for: Perceptions and evaluations of women who experienced the February 2023 Türkiye earthquake: "Everything was so difficult and scary..."
Source: Research Square preprint supplement (doi:10.21203/rs.3.rs-7082863/v1), 2025-08-19
Supplement: Supplementary file 1 [file fa6d74641e0c156b0b0078c1.docx]

**Appendix: Interview guide for Perceptions and evaluations of women who experienced the February 2023 Türkiye earthquake: "Everything was so difficult and scary..."**

Introduction

• Explanation of the study, confidentiality, obtain informed consent, questions

1. Age:

2. Province/district/village/town of residence:

3. Current residence:

4. House (collapsed/heavily damaged/walls cracked)?

5. Who, if any, have lost relatives?

6. Get well soon, everyone… What happened after the earthquake? Can you explain? How are you doing now?

Probing question

a. Basic needs

b. Special needs (pads, hygiene, etc.)

c. Nutrition

d. Security (did you experience any losses such as violence, abuse, theft, or anything else)

 7. What were your main problems after the earthquake? Could you explain a bit?

 8. How did the earthquake affect your personality and behavior?

Alternative: Did your personality and behavior change after the earthquake? Please explain.

 9. As a woman, were your health needs (sanitary pads, underwear, etc.) met after the earthquake? Which services were provided? What weren't? Please explain.

10. How satisfied are you with the assistance and services provided? What were your dissatisfaction points? Alternatively, what were the weaknesses of the services provided to you? Which were the strengths and were you very satisfied with?

11. Can you easily access the services they provide? How?

Probe: Can you give an example? Any other examples?

12. What conditions did you cope with after the earthquake? What was the most difficult, in your opinion? Any other?

13. Explain your thoughts about the deaths of family members/relatives in the earthquake.

14. What did you do to make coping with the effects of the earthquake easier?

Probe: How would you complete this sentence?

“Actually, I would have had it easier if I had ……………………………. with me. …….. ………….…………. I could reach …………….. ……………………………………..

How would you complete this sentence? ………..

15. Is there anything else you'd like to tell me?
